# Supplementary material
Source: PubMed Central journal article supplement (PMC3356775)
Supplement: NIHMS361846-supplement-supplement_1.pdf [file NIHMS361846-supplement-supplement_1.pdf]

**Prediction of Long Term Mortality after Percutaneous Coronary Intervention in Older Adults: Results from the National Cardiovascular Data Registry**

William S Weintraub MD<sup>1</sup>, Maria V Grau-Sepulveda MD, MPH<sup>2</sup>, Jocelyn M Weiss PhD, MPH<sup>3</sup>, Elizabeth R DeLong PhD<sup>2</sup>, Eric D Peterson MD, MPH<sup>2</sup>, Sean M. O'Brien PhD<sup>2</sup>, Paul Kolm PhD<sup>1</sup>, Lloyd W Klein MD<sup>4</sup>, Richard E Shaw PhD<sup>5</sup>, Charles McKay MD<sup>6</sup>, Laura L Ritzenthaler MBA<sup>3</sup>, Jeffrey J Popma MD<sup>7</sup>, John Messenger MD<sup>8</sup>, David M Shahian MD<sup>9</sup>, Frederick L Grover MD<sup>10</sup>, John E Mayer MD<sup>11</sup>, Kirk Garratt MD<sup>12</sup>, Issam Moussa MD<sup>13</sup>, Fred H Edwards MD<sup>14</sup>, George D Dangas MD<sup>15</sup>

**Supplementary Material**

**Supplemental Table 1: Patient Characteristics in the Linked and Not Linked Groups**

| <b>Characteristic</b>       | <b>Overall<br/>(n=526,629)</b> | <b>Linked to CMS<br/>(n=343,496)</b> | <b>Not Linked<br/>(n=183,133)</b> | <b>P Value</b> |
|-----------------------------|--------------------------------|--------------------------------------|-----------------------------------|----------------|
| Age (mean±SD)               | 74±6                           | 75±7                                 | 74±6                              | <0.0001        |
| Male                        | 59%                            | 58%                                  | 61%                               | <0.0001        |
| Race                        |                                |                                      |                                   | <0.0001        |
| White                       | 87%                            | 89%                                  | 84%                               |                |
| Black                       | 4.8%                           | 4.4%                                 | 5.4%                              |                |
| Other                       | 7.7%                           | 6.3%                                 | 10.6%                             |                |
| BMI* (mean±SD)              | 28.5±5.8                       | 28.5±5.8                             | 28.6±5.8                          | <0.0001        |
| Smoking status              |                                |                                      |                                   | <0.0001        |
| Never                       | 46%                            | 46%                                  | 46%                               |                |
| Former                      | 41%                            | 41%                                  | 42%                               |                |
| Current                     | 12%                            | 12%                                  | 12%                               |                |
| Diabetes                    |                                |                                      |                                   | <0.0001        |
| Non-Diabetic                | 66%                            | 67%                                  | 66%                               |                |
| Non-Insulin                 | 24%                            | 24%                                  | 24%                               |                |
| Insulin                     | 9.8%                           | 9.8%                                 | 9.8%                              |                |
| Hypertension                | 81%                            | 81%                                  | 82%                               | 0.0058         |
| Prior MI                    | 27%                            | 27%                                  | 27%                               | 0.0005         |
| Prior CABG                  | 23%                            | 23%                                  | 23%                               | <0.0001        |
| Prior PCI                   | 32%                            | 31%                                  | 33%                               | <0.0001        |
| Heart Failure               | 14%                            | 14%                                  | 13%                               | <0.0001        |
| Renal Failure               | 6.8%                           | 7.0%                                 | 7.2%                              | <0.0001        |
| Chronic Lung Disease        | 18%                            | 19%                                  | 17%                               | <0.0001        |
| Cerebral Arterial Disease   | 16%                            | 16%                                  | 15%                               | <0.0001        |
| Peripheral Arterial Disease | 15%                            | 15%                                  | 14%                               | <0.0001        |
| NYHA* Class 3-4             | 45%                            | 46%                                  | 43%                               | <0.0001        |
| Ejection Fraction           | 52±13                          | 52±13                                | 53±13                             | <0.0001        |
| Multivessel Disease         | 40%                            | 41%                                  | 40%                               | <0.0001        |
| Left Main Disease           | 1.1%                           | 1.1%                                 | 1.0%                              | <0.0001        |
| Pre-Procedure Stenosis      | 13%                            | 13%                                  | 12%                               | <0.0001        |
| Emergent or Salvage         | 13%                            | 14%                                  | 11%                               | <0.0001        |
| Cardiogenic Shock           | 2.3%                           | 2.4%                                 | 2.2%                              | <0.0001        |
| IABP prior to Procedure*    | 0.2%                           | 0.2%                                 | 0.2%                              | 0.034          |
